# Supplementary material for: Tracing the emergence of drowning prevention on the global health and development agenda: a policy analysis
Source: PubMed Central journal article supplement — Lancet Glob Health. 2022 Apr 21;10(7):e1058–66. doi: 10.1016/S2214-109X(22)00074-2 (PMC9197772; doi:10.1016/s2214-109x(22)00074-2), 2022-04-21
Supplement: mmc1.pdf [file mmc1.pdf]

# THE LANCET

## Global Health

### Supplementary appendix

This appendix formed part of the original submission and has been peer reviewed.  
We post it as supplied by the authors.

Supplement to: Scarr J-P, Buse K, Norton R, Meddings DR, Jagnoor J. Tracing the emergence of drowning prevention on the global health and development agenda: a policy analysis. *Lancet Glob Health* 2022; published online April 21. [https://doi.org/10.1016/S2214-109X\(22\)00074-2](https://doi.org/10.1016/S2214-109X(22)00074-2).

## **APPENDIX**

### **Table of contents**

|                                                                                                                                 |   |
|---------------------------------------------------------------------------------------------------------------------------------|---|
| Search strategy and selection criteria.....                                                                                     | 2 |
| Table 1: Key informant main constituency, location, WHO region, background, and gender classification, by interview number..... | 3 |

## **Search strategy and selection criteria**

The document search aimed to identify the factors that shaped the prioritisation of drowning prevention and any evidence of drowning prevention within health and sustainable development literature.

We searched PubMed, The Cochrane Library, Web of Science, Embase (search terms: “drowning”, “drowning [MESH]” or “drowning, near [MESH]”), and the web databases of World Health Organization (WHO), Iris, World Bank, United Nations Children’s Fund (UNICEF) (search terms “drowning” or “water safety”), and the documents referenced in the Resolution.

The search covered the period from January 2000 to July 2021. Search results and extracted data were further screened for “policy” and “policy analysis” in the title, abstract or keywords for inclusion in the document review.

The search included reports, empirical studies, policies, strategies, and data broadly associated with drowning prevention actors. We included global and regional level documents, published by global level actors including UN agencies and other multilaterals, international NGOs, and development agencies reporting on multiple countries or a region. National and sub-national reports were excluded as they were not relevant to the study objectives. We included English language articles only.

Documents were also identified as relevant to the aims of this study through cross-referencing of primary documents commencing with the Resolution, documents identified through previous studies, and by key informants.

The READ (Ready materials, Extract data, Analyse data, Distil) approach was used for document review to identify sectors and actors involved in drowning prevention, and the reporting of drowning prevention.<sup>1</sup>

---

<sup>1</sup> Dalglish SL, Khalid H, McMahon SA. Document analysis in health policy research: the READ approach. Health Policy Plan. 2020.

**Table 1: Key informant main constituency, location, WHO region, background, and gender classification, by interview number**

| <b>Interview</b> | <b>Main Constituency</b>                 | <b>Location</b> | <b>Region (WHO)</b>     | <b>Background</b>                                                       | <b>Gender</b> |
|------------------|------------------------------------------|-----------------|-------------------------|-------------------------------------------------------------------------|---------------|
| 1                | UN Agency                                | GLOBAL          | Headquarters (Geneva)   | Technical specialist, Investigator in LMIC programmes                   | Male          |
| 2                | International NGO                        | HIC             | Americas                | Technical specialist, co-investigator in LMIC programmes                | Male          |
| 3                | National NGO                             | HIC             | Europe                  | Advocacy specialist, independent secretariate for member state briefing | Female        |
| 4                | Philanthropic Group                      | HIC             | Americas                | Funder of global programmes, funder of LMIC programmes                  | Female        |
| 5                | Academic                                 | LMIC            | Africa                  | Investigator in LMIC programmes, government advisor                     | Female        |
| 6                | Academic                                 | LMIC            | Southeast Asia          | Investigator in LMIC programmes, government advisor                     | Male          |
| 7                | UN Agency                                | GLOBAL          | Headquarters (Geneva)   | High level policy specialist                                            | Male          |
| 8                | UN Agency                                | GLOBAL          | Headquarters (New York) | High level policy specialist                                            | Male          |
| 9                | International NGO                        | HIC             | Western Pacific         | Technical specialist, funder of LMIC programmes                         | Male          |
| 10               | National NGO                             | HIC             | Europe                  | Advocacy specialist, funder of LMIC programmes                          | Male          |
| 11               | National Government (Development Agency) | HIC             | Western Pacific         | Government policy specialist, funder LMIC programmes                    | Male          |
| 12               | Academic                                 | HIC             | Western Pacific         | Technical specialist, Investigator in LMIC programmes                   | Female        |
| 13               | Philanthropic Group                      | LMIC            | Southeast Asia          | Advocacy specialist, funder in LMIC programmes                          | Male          |
| 14               | National NGO                             | HIC             | Europe                  | Advocacy specialist, independent secretariate for member state briefing | Female        |
| 15               | UN Agency                                | GLOBAL          | Western Pacific         | Government advisor, funder of LMIC programmes                           | Male          |

|             |                                                 |      |                 |                                                                   |        |
|-------------|-------------------------------------------------|------|-----------------|-------------------------------------------------------------------|--------|
| 16          | National Government (UN Mission Representative) | HIC  | Europe          | UN New York Mission based, and government policy specialist       | Female |
| Refusal     | UN Agency                                       | HIC  | Europe          | Limited interest, expertise in drowning prevention                | Female |
| Refusal     | National Government                             | LMIC | Southeast Asia  | Government rules required bureaucratic approvals                  | Female |
| No response | UN agency                                       | HIC  | Europe          | Past LMIC experience, no response, changing roles                 | Male   |
| No response | International NGO                               | LMIC | Western Pacific | No response likely due to COVID-19 impacts at the time of request | Female |

Legend:

HIC = high income country. LMIC = low- and middle-income country. NGO = non-government organisation. UN = United Nations. WHO = World Health Organization.
